# Supplementary material
Source: Springer Nature journal article supplement (https://www.springermedizin.de/resource/supplementary/12985_2006_205_MOESM4_ESM.pdf/9607488)

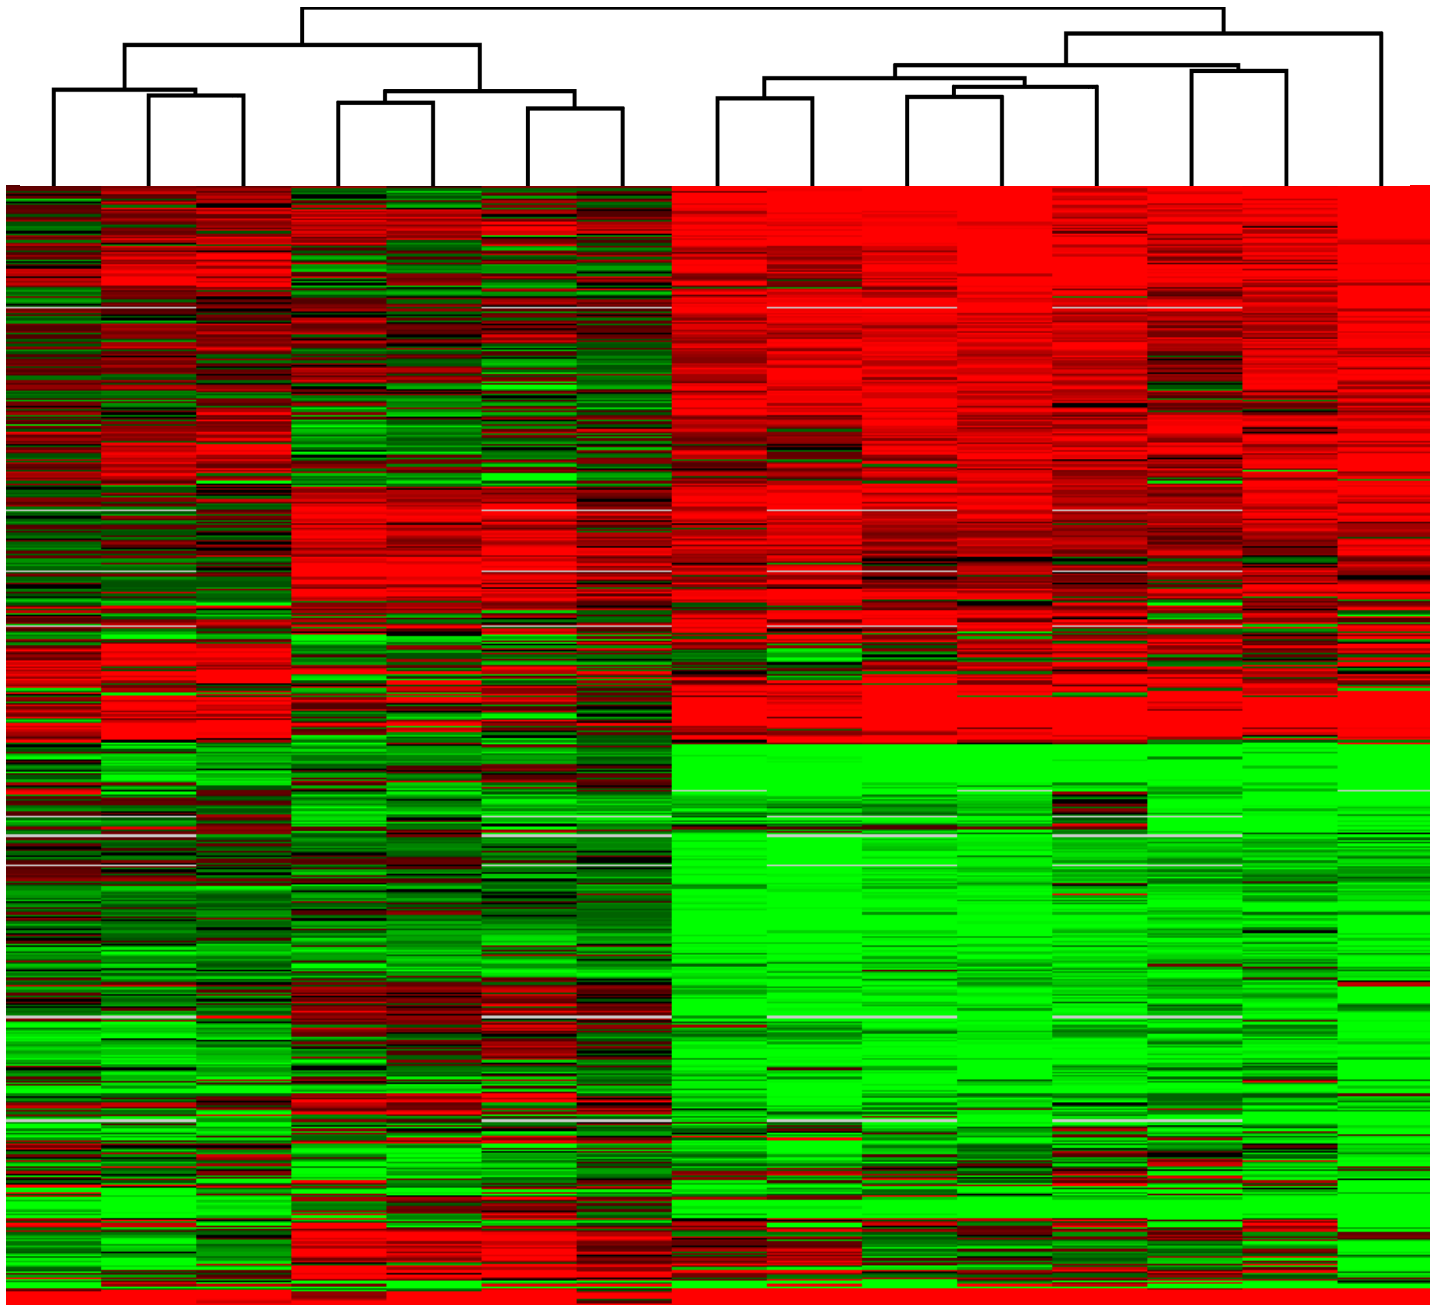

1228:Et-OH-C

1227:Et-OH-C

1164:Et-OH-B

1263:Et-OH-A

1240:Et-OH-A

1239:Et-OH-A

1245:Et-OH-A

1015:HCV-A

1019:HCV-A

1037:HCV-B

1035:HCV-C

1038:HCV-B

1023:HCV-A

1039:HCV-C

1022:HCV-A

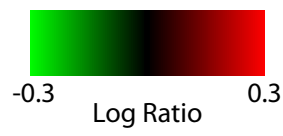

Supplement: MOESM4 [file 9607488]
